# Supplementary material
Source: Springer Nature journal article supplement (https://www.springermedizin.de/resource/supplementary/12936_2007_550_MOESM4_ESM.pdf/9548266)

**A**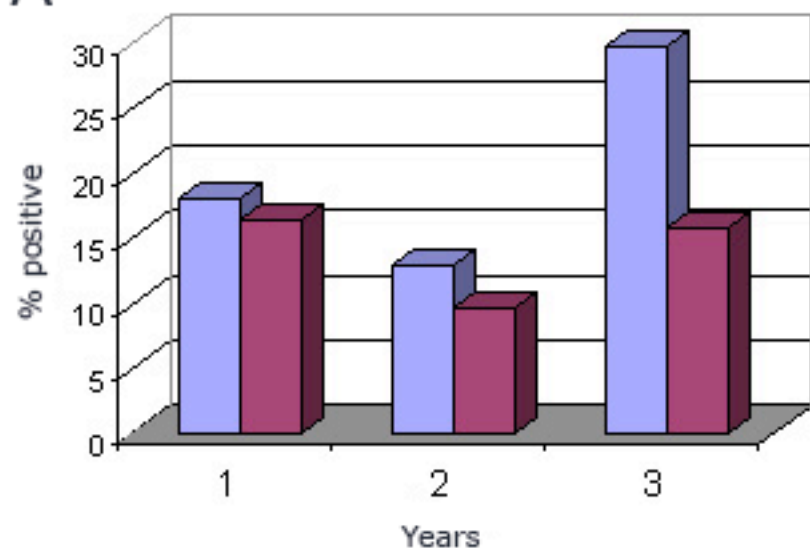**B**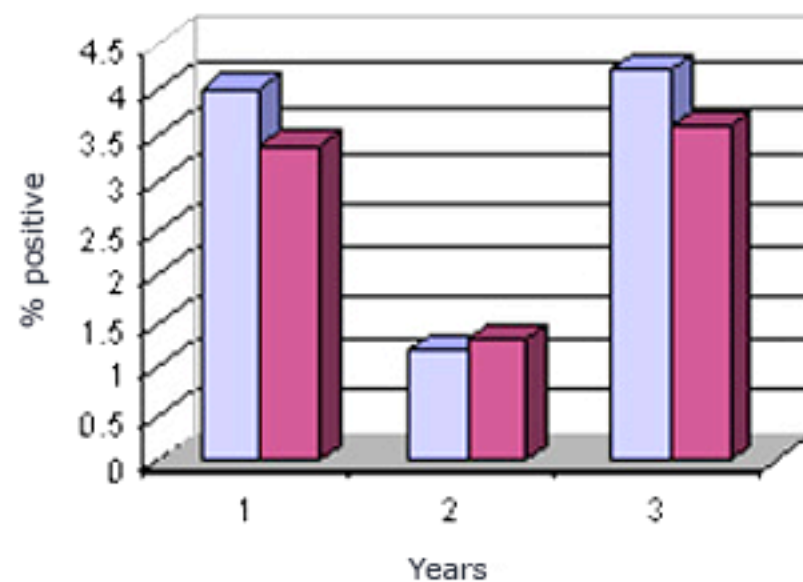**C**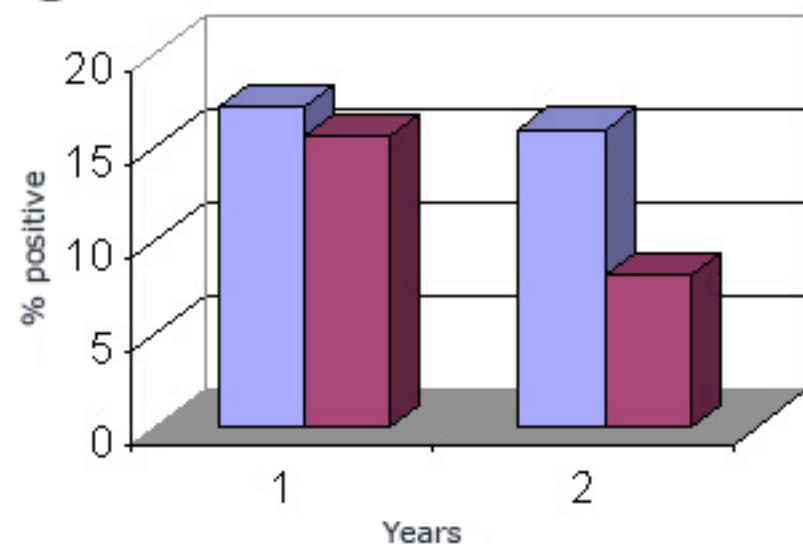**D**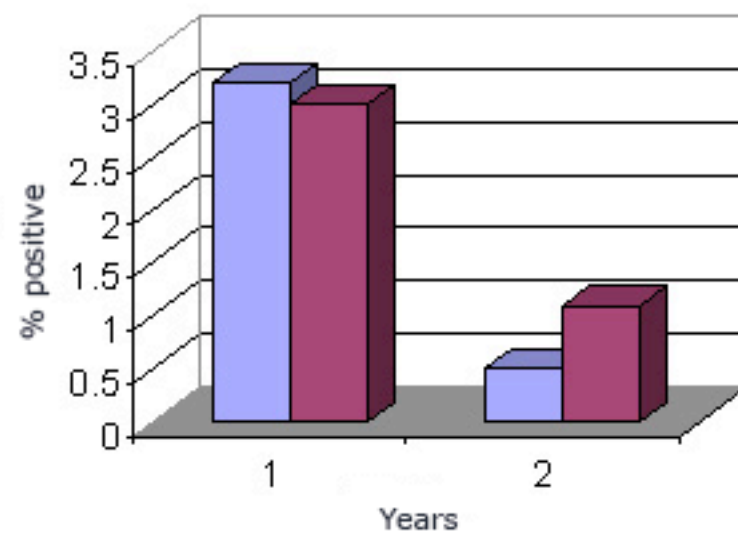

Control Experimental

Supplement: MOESM4 [file 9548266]
